# Supplementary material for: Borneol-driven meningeal lymphatic drainage clears amyloid-β peptide to attenuate Alzheimer-like phenotype in mice
Source: PubMed Central journal article supplement (PMC9800736; doi:10.7150/thno.76133), 2023-01-01
Supplement: thnov13p0106s1.pdf [file thnov13p0106s1.pdf]

## Supplementary Material

**Table S1. Primer sequences and conditions for RT-qPCR.**

| Target    | Product length (bp) | Annealing temperature (°C) | Primer (5'-3')         | Genbank accession no. |
|-----------|---------------------|----------------------------|------------------------|-----------------------|
| R-VEGFC-S | 147                 | 60                         | AACCCCTGAATCCTGGAAAAT  | NM_053653.2           |
| R-VEGFC-A |                     |                            | ACAGTCCCGGATCACAATGCT  |                       |
| R-FOXC2-S | 200                 | 60                         | AAGTGGTGGTCAAGAGCGAG   | NM_001101680.1        |
| R-FOXC2-A |                     |                            | CATGATGGTCTCCACGCTGA   |                       |
| R-GAPDH-S | 138                 | 60                         | CTGGAGAAACCTGCCAAGTATG | NM_017008.4           |
| R-GAPDH-A |                     |                            | GGTGGAAGAATGGGAGTTGCT  |                       |

## Figures

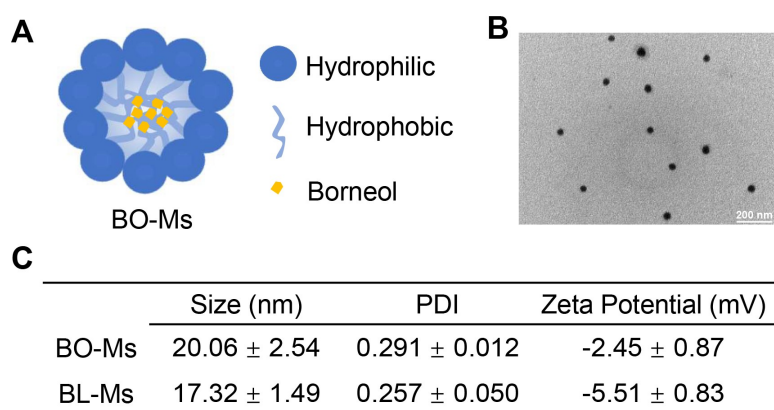

**Figure S1. Characterization of BO-Ms and BL-Ms.**

**(A)** Schematic of BO-Ms. **(B)** TEM images of the BO-Ms. (Scale bars, 200 nm).

**(C)** Particle diameters and Zeta potential of BO-Ms and BL-Ms. (n = 5, Data are means  $\pm$  SEM).

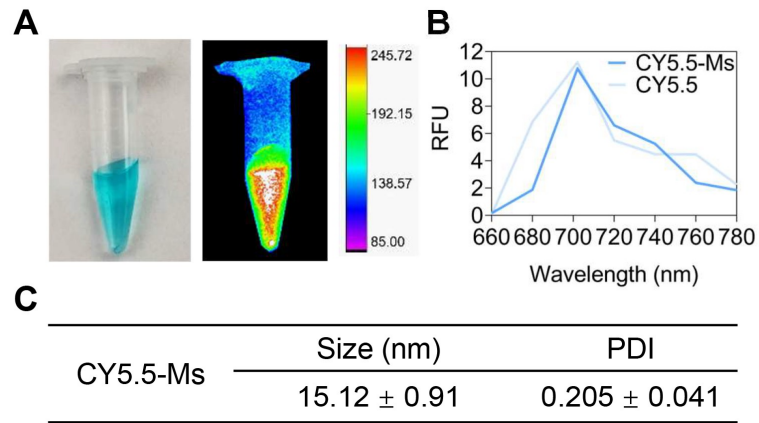

**Figure S2. Characterization of CY5.5-Ms.**

**(A)** Photos of CY5.5-Ms (left) and fluorescence images (right) by an *in vivo* imaging system. (Ex = 610 nm, Em = 700 nm). **(B)** Fluorescence emission spectra of CY5.5-Ms. (Ex = 610 nm). **(C)** Particle diameters and PDI of CY5.5-Ms (n = 5, Data are means  $\pm$  SEM).

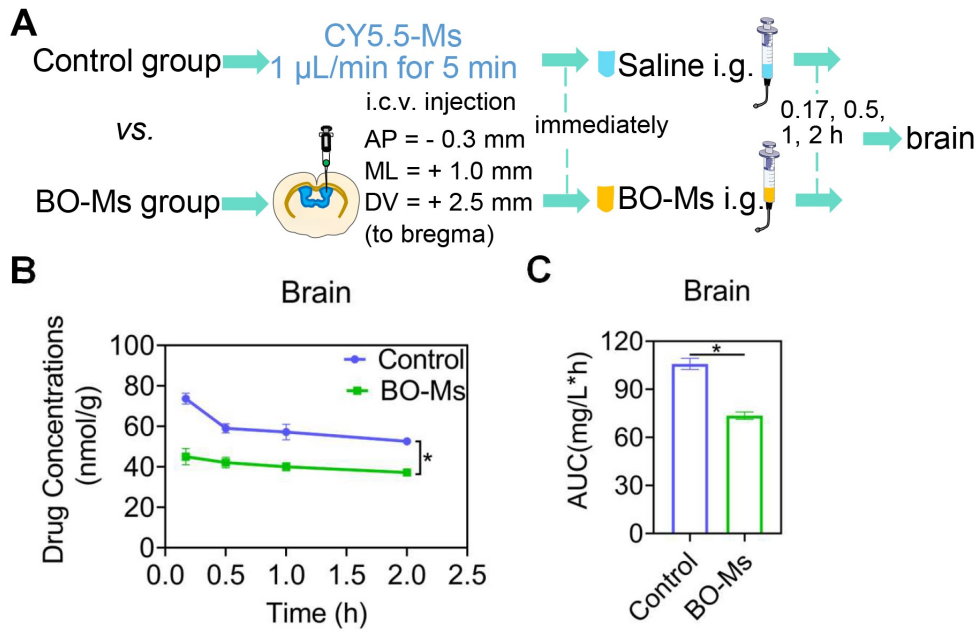

**Figure S3. BO-Ms improve the efflux of CY5.5-Ms from the brain.**

**(A)** Schematic of the experimental layout where mice were injected intracerebroventricular (i.c.v.) with CY5.5-Ms and then intragastrical administration (i.g.) of saline or BO-Ms. **(B)** Content of CY5.5-Ms in mice brain in both groups at the 10, 30, 60, and 120 min. \* $p < 0.05$  (Student's  $t$ -test),  $n = 3-4$  mice per group, representative of two independent experiments. Data are means  $\pm$  SEM. **(C)**  $\text{AUC}_{(\text{mg}/\text{L}^*\text{h})}$  of CY5.5-Ms in the brain in the control group and BO-Ms group. \* $p < 0.05$  (Student's  $t$ -test),  $n = 3-4$  mice per group, representative of two independent experiments. Data are means  $\pm$  SEM.

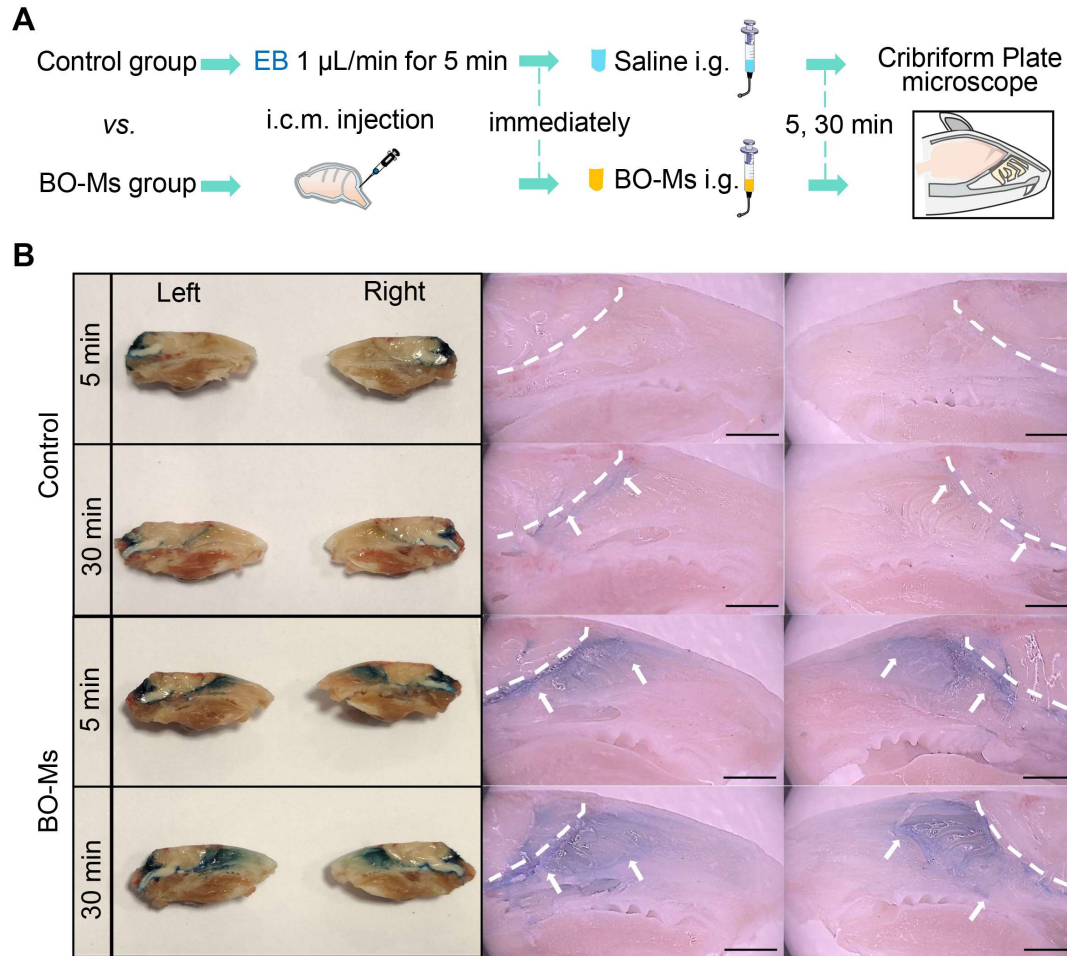

**Figure S4. BO-Ms enhance CSF flow into the nasal cavity.**

**(A)** Schematic of the experimental layout where mice were injected the cisterna magna (i.c.m.) with EB and then intragastrical administration (i.g.) of saline or BO-Ms. **(B)** Representative images of the drainage of EB through the cribriform plate into the nasal cavity in the control group and BO-Ms group. (Scale bars, 1 mm).

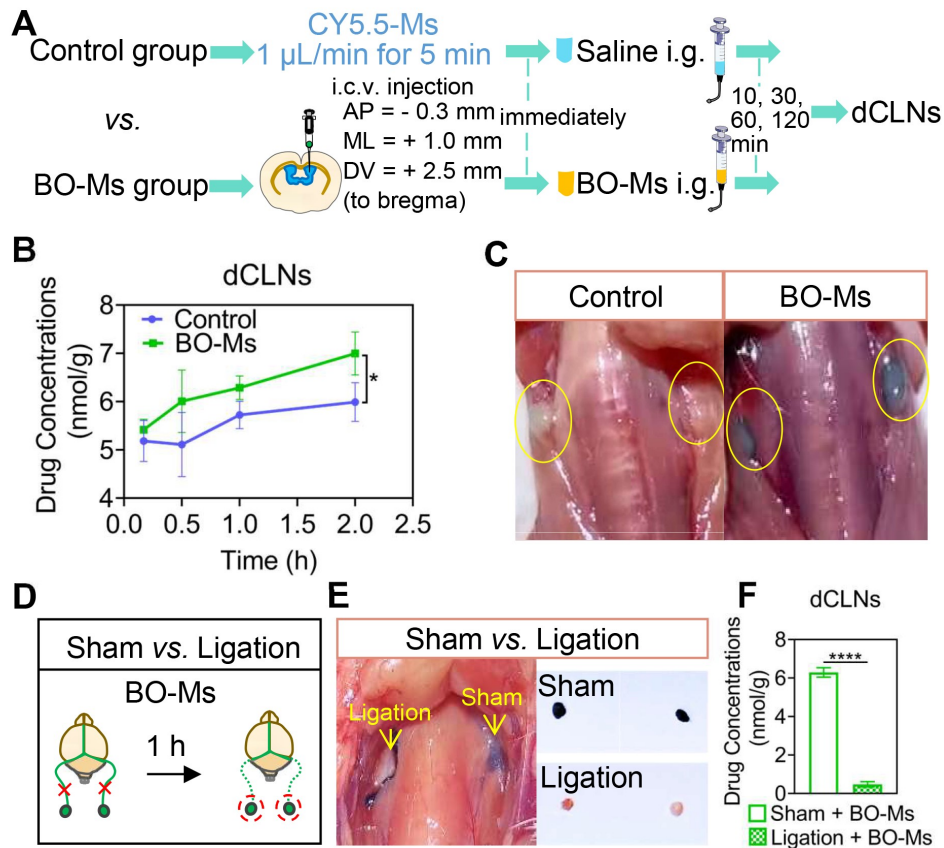

**Figure S5. BO-Ms clear the CY5.5-Ms from the CNS into dCLNs via meningeal lymphatics.**

**(A)** Schematic of the experimental layout where mice were injected intracerebroventricular (i.c.v.) with CY5.5-Ms and then intragastrical administration (i.g.) of normal saline as a control group or BO-Ms. The dCLNs were harvested at various times after administration. **(B)** Content of CY5.5-Ms in mice dCLNs in control and BO-Ms groups at the 10, 30, 60, and 120min. \* $p < 0.05$  (Student's  $t$ -test),  $n = 3-4$  mice per group, representative of two independent experiments. Data are means  $\pm$  SEM. **(C)** Representative images of the dCLNs in the control group and BO-Ms group which 1 h after CY5.5-Ms i.c.v. injection and then the saline or BO-Ms were orally administered. **(D)** Schematic of the experimental ligation of the afferent lymphatic vessel of the dCLNs. **(E)** Representative images of the ligation surgery. Sham-operated or ligated animals were injected with 5  $\mu\text{l}$  of CY5.5-Ms in the lateral ventricle and then oral administration of BO-Ms. The dCLNs were harvested 1 h after BO-Ms oral gavage. Representative images of the CY5.5-Ms accumulation in the dCLNs of the sham-operated group and ligated group. **(F)** Quantity of CY5.5-Ms in the dCLNs in BO-Ms sham group and BO-Ms ligation group 1 h after CY5.5-Ms i.c.v. injection and then the BO-Ms were orally administered. \*\*\*\* $p < 0.001$  (Student's  $t$ -test),  $n = 3-4$  mice per group, representative of two independent experiments. Data are means  $\pm$  SEM.

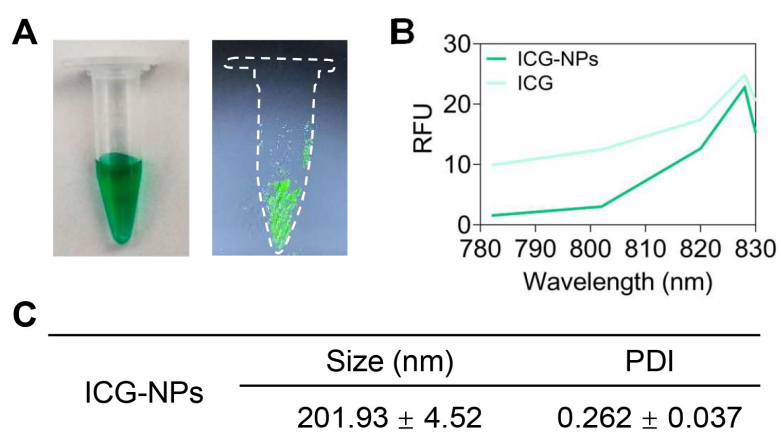

**Figure S6. Characterization of ICG-NPs.**

**(A)** Photos of ICG-NPs (left) and fluorescence images (right) by a near-infrared fluorescence imaging system of DPM. **(B)** Fluorescence emission spectra of ICG-NPs. (Ex = 760 nm). **(C)** Particle diameters and PDI of ICG-NPs (n = 5, Data are means  $\pm$  SEM).

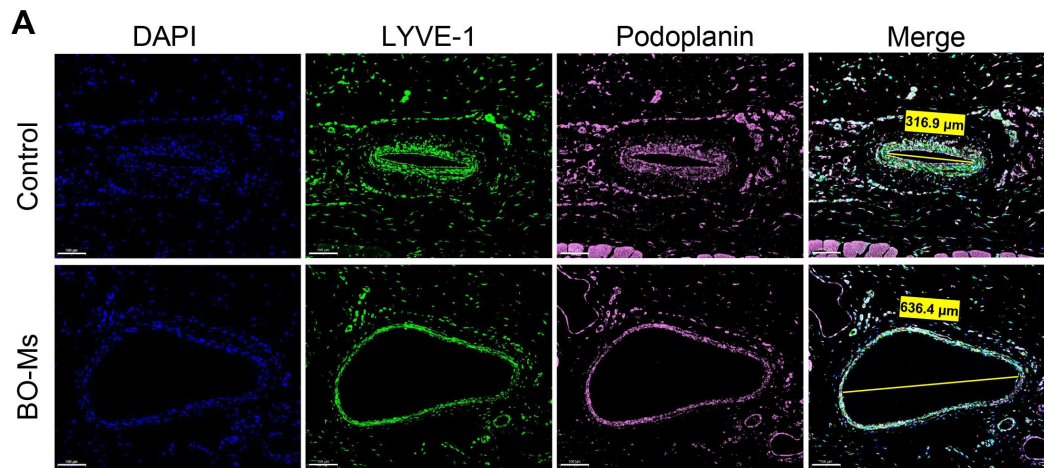

**Figure S7. Effect of BO-Ms on the changes in the lymphatic vessels morphology.**

**(A)** Representative image of lymphatic vessels stained with DAPI (blue), anti-LYVE-1 antibody (green), and anti-Podoplanin-antibody (pink) in the control group and BO-Ms group. (Scale bars, 100  $\mu\text{m}$ ).



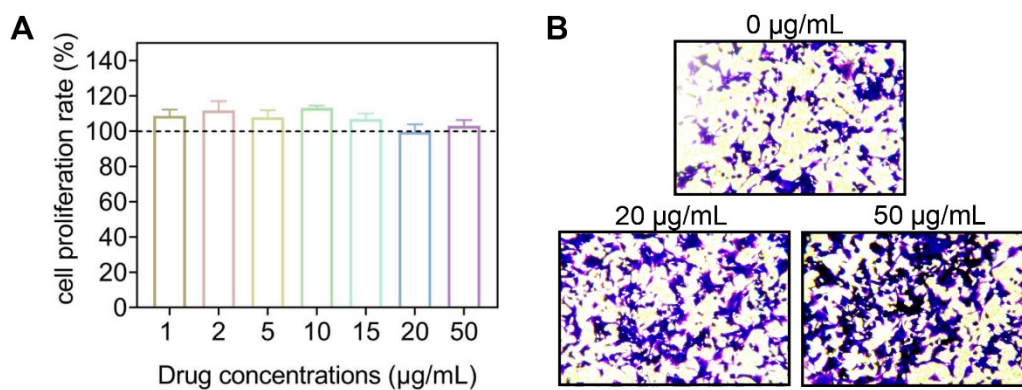

**Figure S8. Effects of borneol on proliferation and migration of MLECs.** (A) Proliferation rate of MLECs with different concentrations of borneol (1, 2, 5, 10, 15, 20, and 50  $\mu\text{g/mL}$ ). (B) Representative imaging of MLECs migration at different concentrations of borneol (0, 20, 50  $\mu\text{g/mL}$ ) stained by crystal violet.

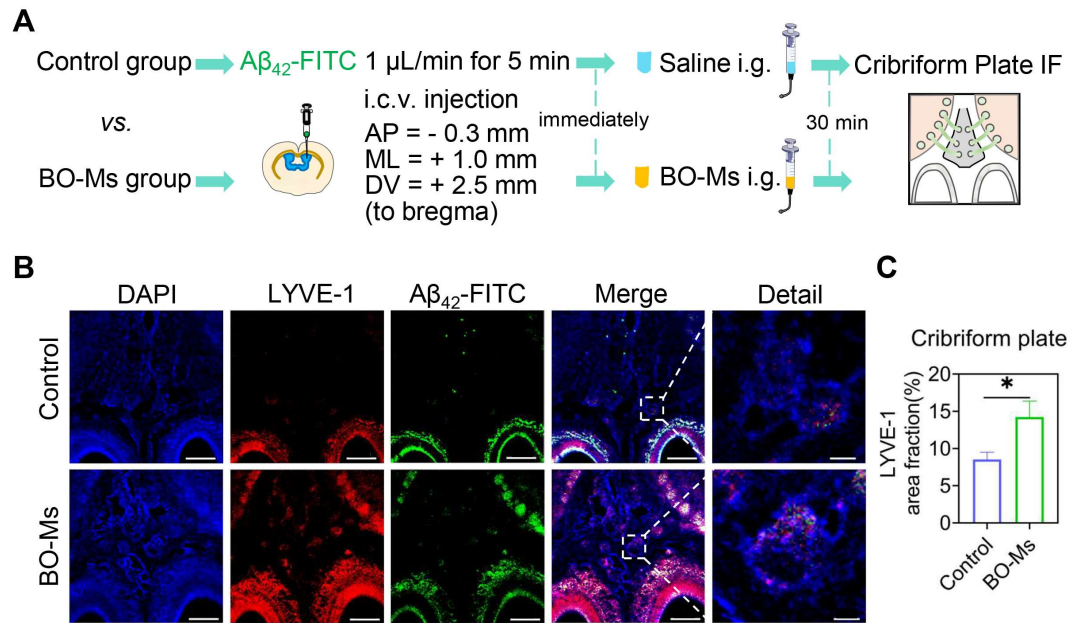

**Figure S9. BO-Ms enhance Aβ<sub>42</sub> across the cribriform plate.**

**(A)** Schematic of the experimental layout where mice were injected the intracerebroventricular (i.c.v.) with Aβ<sub>42</sub>-FITC oligomers and then intragastrical administration (i.g.) of saline or BO-Ms. **(B)** Representative cribriform plate stained with DAPI (blue) and anti-LYVE-1 antibody (red) showing Aβ<sub>42</sub>-FITC oligomers (green) distribution in the cribriform plate vessels of the control group and BO-Ms group at 30 min. (Scale bars, 100 μm. Details figures scale bars, 20 μm). **(C)** Quantification of the percent area coverage of LYVE-1 antibody staining in the cribriform plate. \**p* < 0.05 (Student's *t*-test), *n* = 3 mice per group. Data are means ± SEM.

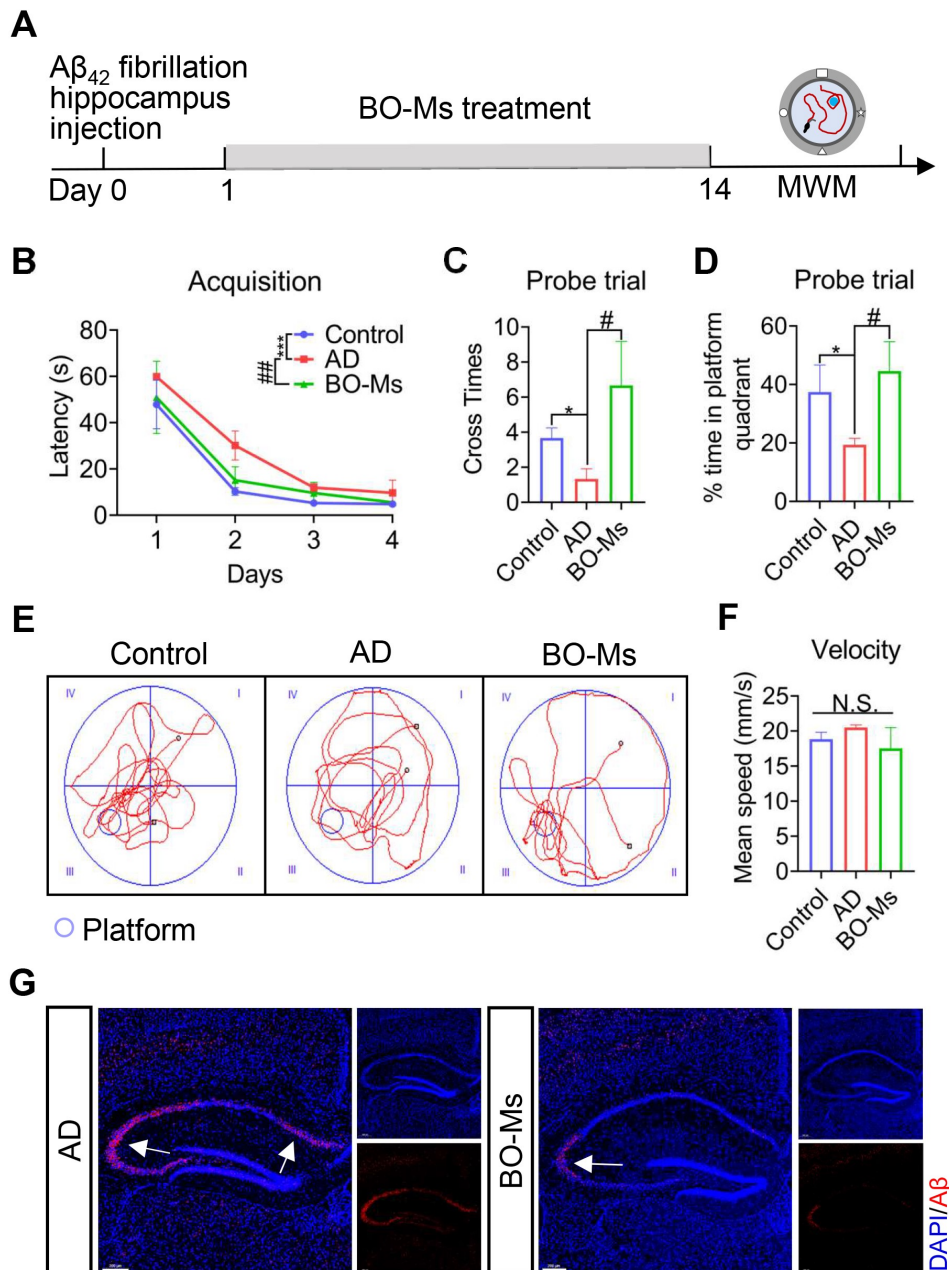

**Figure S10. BO-Ms improved memory deficits in AD mice induced by A $\beta_{42}$  fibrillation.**

(A) Timeline of BO-Ms treatment in AD mice induced by A $\beta_{42}$  fibrillation. (B) Escape latency to the platform during the training trails in an MWM. \*\*\* $p < 0.001$ , vs. control group.  $n = 6$  mice per group. ## $p < 0.01$ , vs. AD group.  $n = 6$  mice per group. Data are means  $\pm$  SEM. (C) The number of target platform crossings in the probe test. \* $p < 0.05$ , vs. control group.  $n = 6$  mice per group. # $p < 0.05$ , vs. AD group.  $n = 6$  mice per group. Data are means  $\pm$  SEM. (D) Time spent in the target quadrant in the probe test. \* $p < 0.05$ , vs. control group.  $n = 6$  mice per group. # $p < 0.05$ , vs. AD group.  $n = 6$  mice per group. Data are means  $\pm$  SEM. (E) Representative track images of mice in the probe test. (F) Mean swimming velocity of mice. N.S. = not significant. (G) Representative

images of brain sections from each group were analyzed by DAPI (blue) and Anti-A $\beta$ 1-42-antibody (red) immunofluorescence. White arrow: A $\beta$ <sub>42</sub> deposition. (Scale bars, 200  $\mu$ m).
